# Supplementary material
Source: PubMed Central journal article supplement (PMC9898459)
Supplement: NIHMS1828090-supplement-SF1.pdf [file NIHMS1828090-supplement-SF1.pdf]

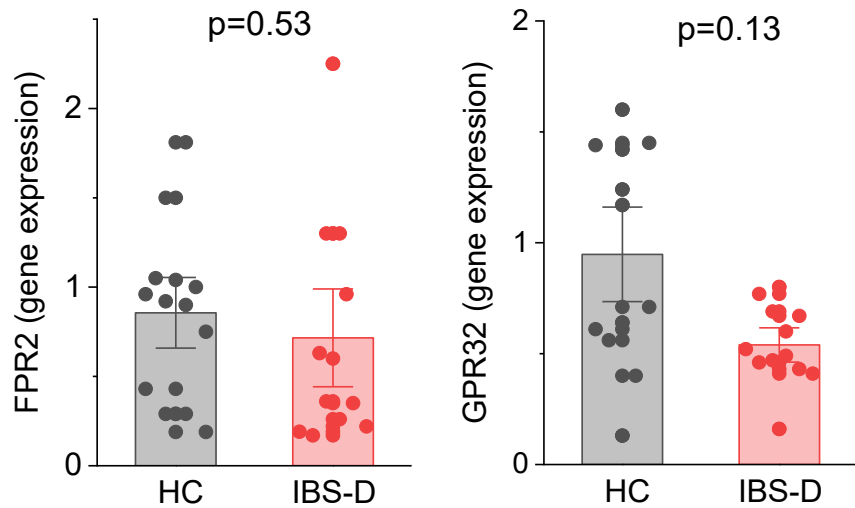

**Supplementary figure 1.** qPCR data showing the levels of *FPR2* and *GPR32* mRNA in colonic biopsy samples from healthy controls (HC, n=16) and IBS-D (n=16) patients. ns, non significant from HC; unpaired t-test.
