# Supplementary material
Source: PubMed Central journal article supplement (PMC9898459)
Supplement: NIHMS1828090-supplement-SF2.pdf [file NIHMS1828090-supplement-SF2.pdf]

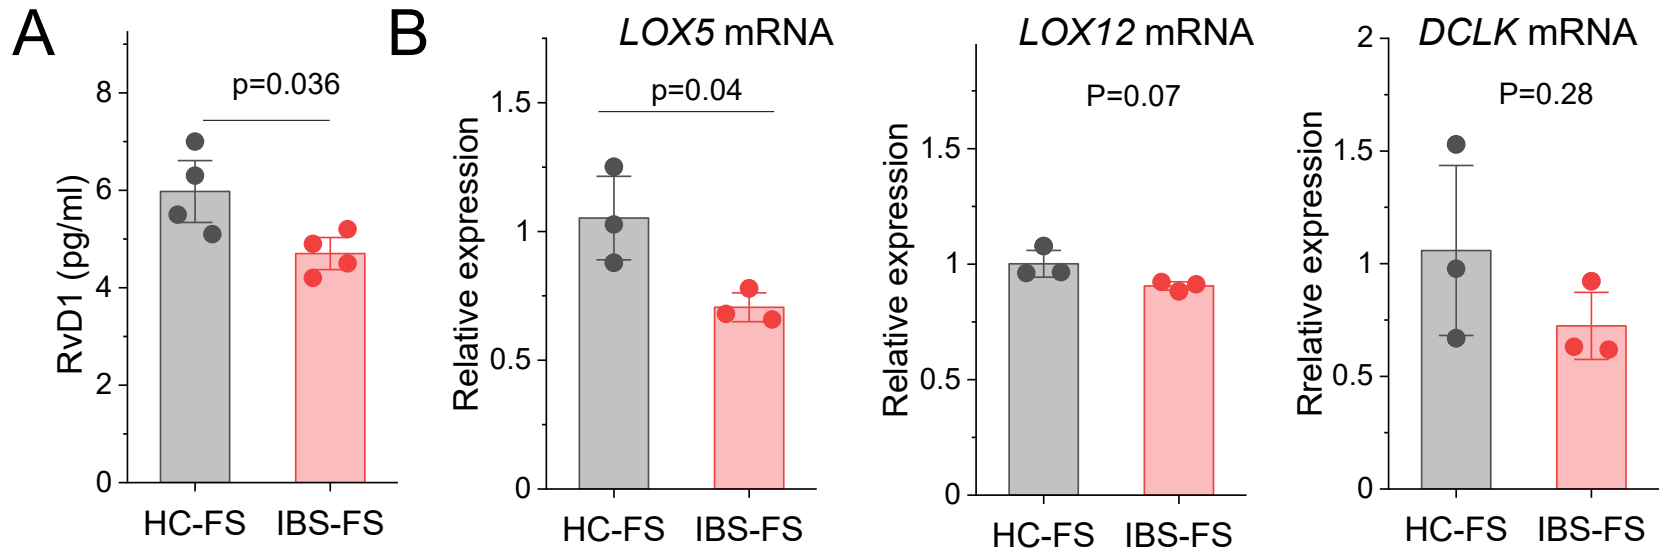

**Supplementary figure 2.** A. ELISA data show RvD1 level in colonoids obtained from colonic biopsies of healthy control subjects in response to 24 h treatment with HC-FS or IBS-FS. B. qPCR data show relative expression of *LOX5*, *LOX12* and *DCLK1* mRNA levels in colonoids obtained from colonic biopsies of healthy control subjects in response to 24 h treatment with HC-FS or IBS-FS.
