# Supplementary material
Source: PubMed Central journal article supplement (PMC9898459)
Supplement: NIHMS1828090-supplement-SF3.pdf [file NIHMS1828090-supplement-SF3.pdf]

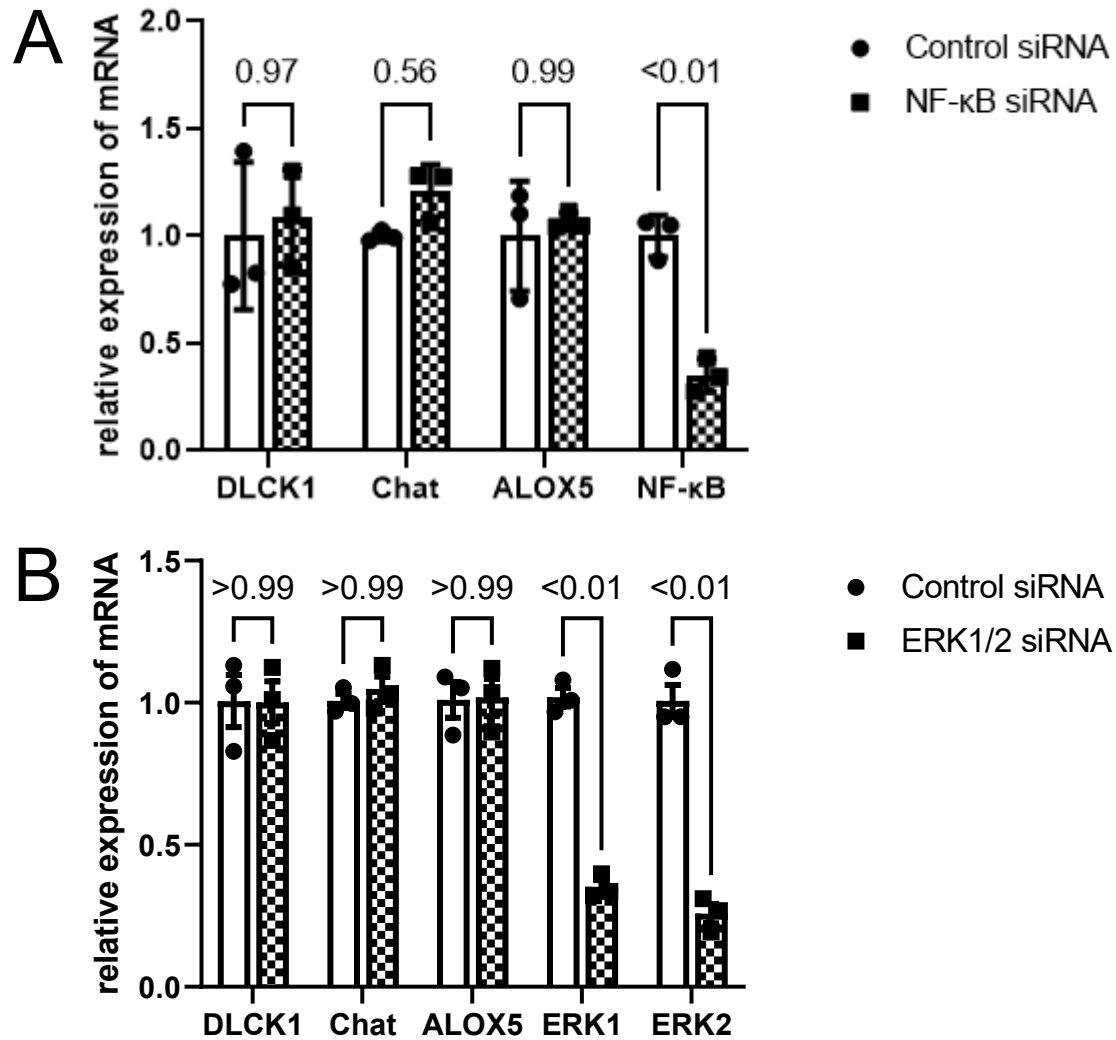

**Supplementary figure 3.** qPCR data showing the levels of *Dclk1*, *Chat*, *Alox5*, *Erk1* and *Erk2* in colonoids 72 hours after transfection with control siRNA, *NFKb* or *Erk1* and *Erk2* siRNA.
