# Supplementary material
Source: PubMed Central journal article supplement (PMC9898459)
Supplement: NIHMS1828090-supplement-SF4.pdf [file NIHMS1828090-supplement-SF4.pdf]

Lox 5

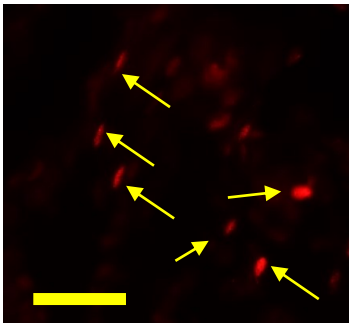

Chat

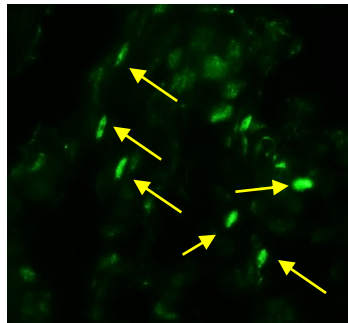

Overlay

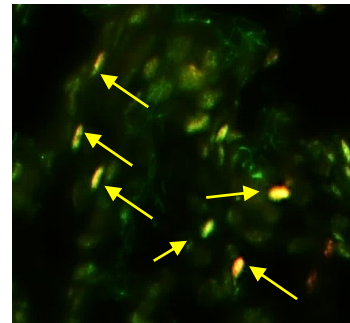

**Supplementary figure 4.** Immunohistochemical demonstration of Lox5 (red) and Chat (green) immunoreactivities in the intestinal tissue. Overlap show in yellow. Bar 50  $\mu$ m.
