# Supplementary material
Source: PubMed Central journal article supplement (PMC9898459)
Supplement: NIHMS1828090-supplement-SF5.pdf [file NIHMS1828090-supplement-SF5.pdf]

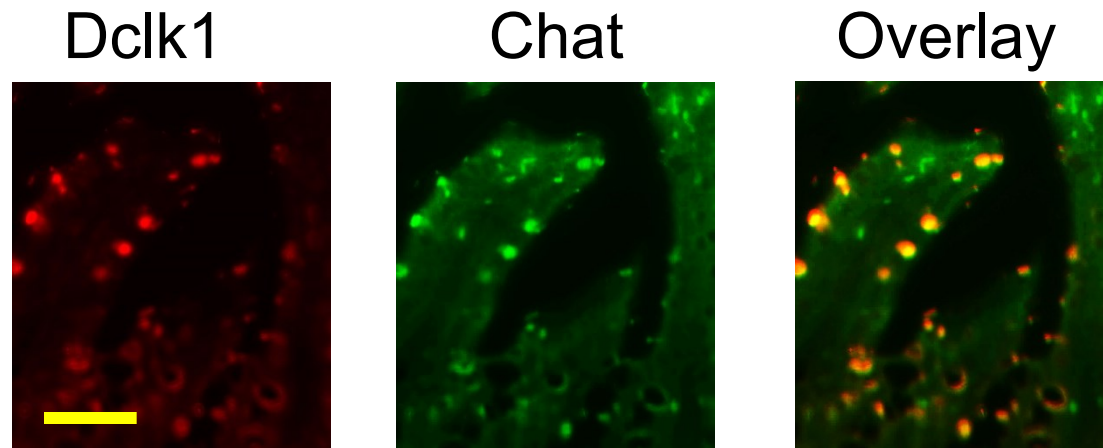

**Supplementary figure 5.** Immunohistochemical demonstration of Dclk1(red) and Chat (green) immunoreactivities in the intestinal tissue from germ-free mouse. Overlap show in yellow. Bar 30  $\mu$ m.
