# Supplementary material
Source: PubMed Central journal article supplement (PMC9898459)
Supplement: NIHMS1828090-supplement-SF6.pdf [file NIHMS1828090-supplement-SF6.pdf]

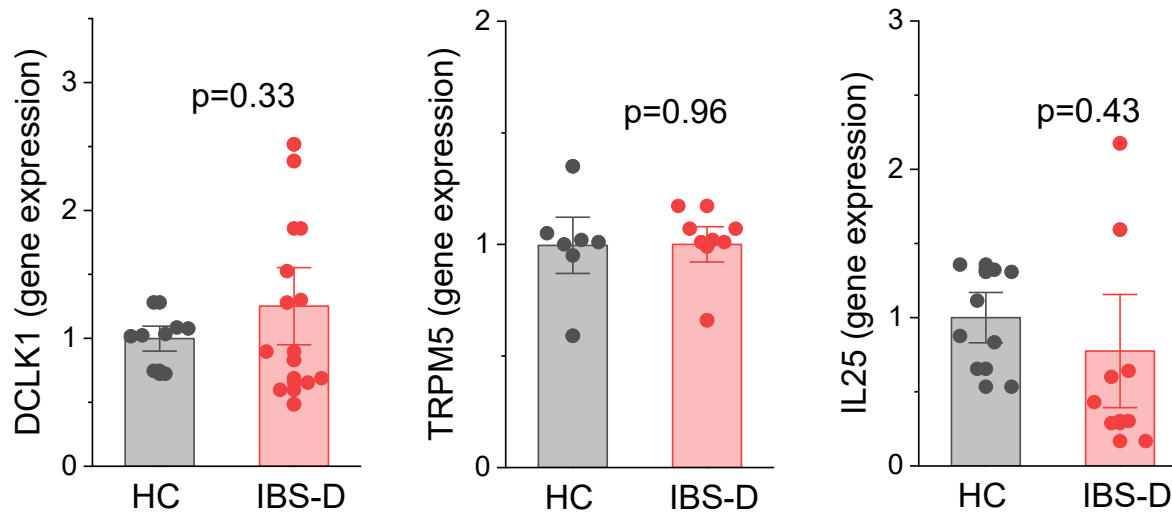

**Supplementary figure 6.** qPCR data showing the levels of *DCLK1*, *TRPM5* and *IL25* mRNA in colonic biopsy samples from healthy controls (HC, n=8) and IBS-D (n=8) patients.
